# Supplementary material
Source: Springer Nature journal article supplement (https://www.springermedizin.de/resource/supplementary/12882_2013_769_MOESM1_ESM.pdf/9454684)
Supplement: MOESM1 [file 9454684]

H-L-Cys-OH

|

S — S

|

Ac-D-Cys-D-Ala-D-Arg-D-Arg-D-Arg-D-Ala-D-Arg-NH<sub>2</sub>
